# Supplementary material for: Dabrafenib and Trametinib prolong coagulation through the inhibition of tissue factor in BRAFv600e mutated melanoma cells in vitro
Source: PubMed Central journal article supplement (PMC6712666; doi:10.1186/s12935-019-0938-3), 2019-08-28
Supplement: 12935_2019_938_MOESM2_ESM.pdf [file 12935_2019_938_MOESM2_ESM.pdf]

## Clotting time calculation

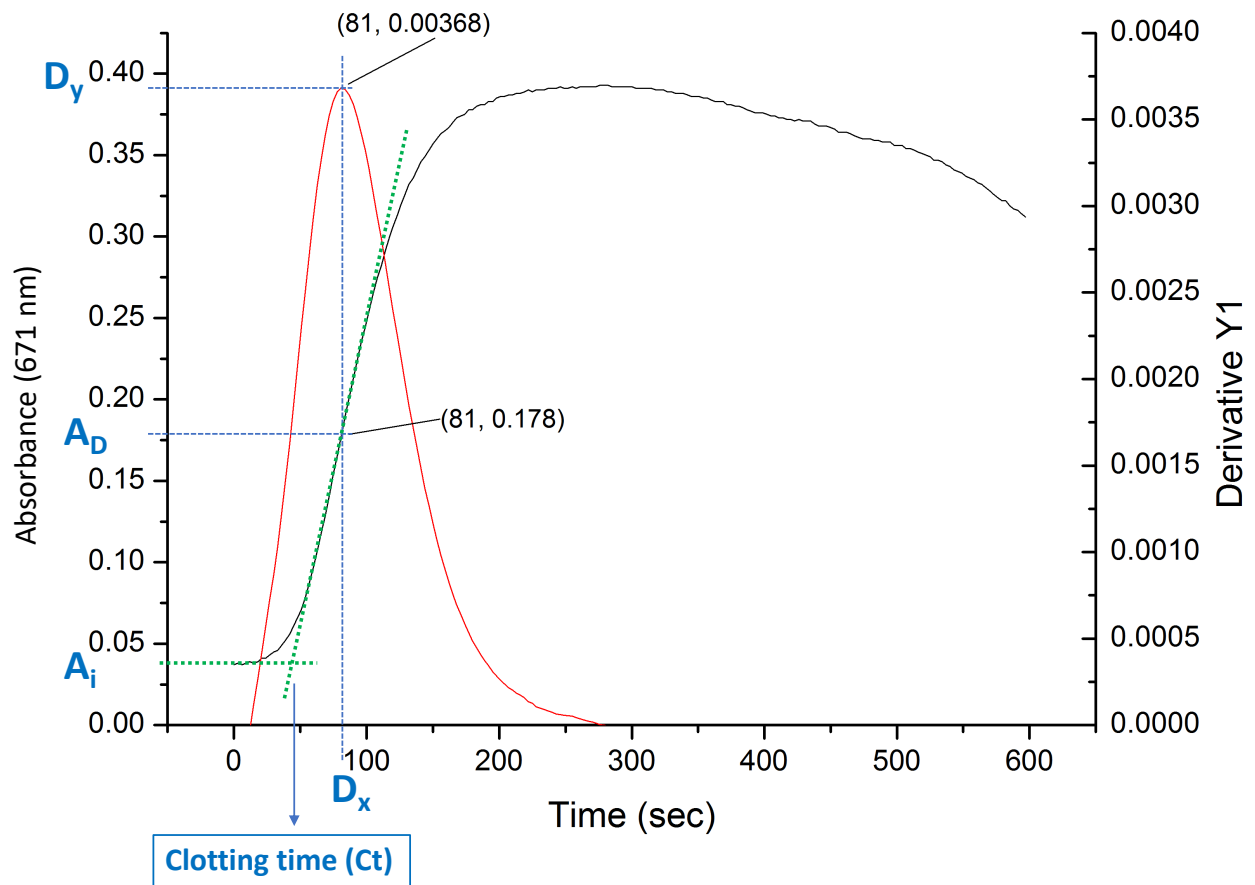

The peak of the first derivative ( $D_x$ ,  $D_y$ ) locates the point of maximum speed of the reaction. The value ( $D_y$ ) of the first derivative in  $D_x$  correspond to the slope of the tangent line at the point ( $D_x$ ,  $A_D$ )

The equation of the tangent line and passing through ( $D_x$ ,  $A_D$ ) follows:

$$\begin{cases} y = mx + b \\ m = D_y \\ b = A_D - D_y D_x \end{cases}$$

$$y = D_y x + A_D - D_y D_x$$

The coordinate (Ct) of the intersection point is:

$$\begin{cases} y = D_y x + A_D - D_y D_x \\ y = A_i \end{cases}$$

$$x = Ct = \frac{A_i - A_D + D_y D_x}{D_y}$$
