# Supplementary material for: Dabrafenib and Trametinib prolong coagulation through the inhibition of tissue factor in BRAFv600e mutated melanoma cells in vitro
Source: PubMed Central journal article supplement (PMC6712666; doi:10.1186/s12935-019-0938-3), 2019-08-28
Supplement: 12935_2019_938_MOESM3_ESM.pdf [file 12935_2019_938_MOESM3_ESM.pdf]

## Biological repeats of WB analysis for SK-MEL-28 cell line

Western blot analysis was repeated on samples collected in the three experiments for TF activity evaluation from the SK-MEL-28 cell line.

Protein detection was performed using the Roche ECL substrate instead of Bio-Rad Clarity western ECL substrate which was not available; the ChemiDoc MP imager auto-expose tool was used to detect the chemiluminescent signal. The abundance of the TF protein was normalized to the total amount of the housekeeping protein ( $\beta$ -tubulin) in each lane; densitometry was performed using the open-source software ImageJ.

The images for densitometry follow:

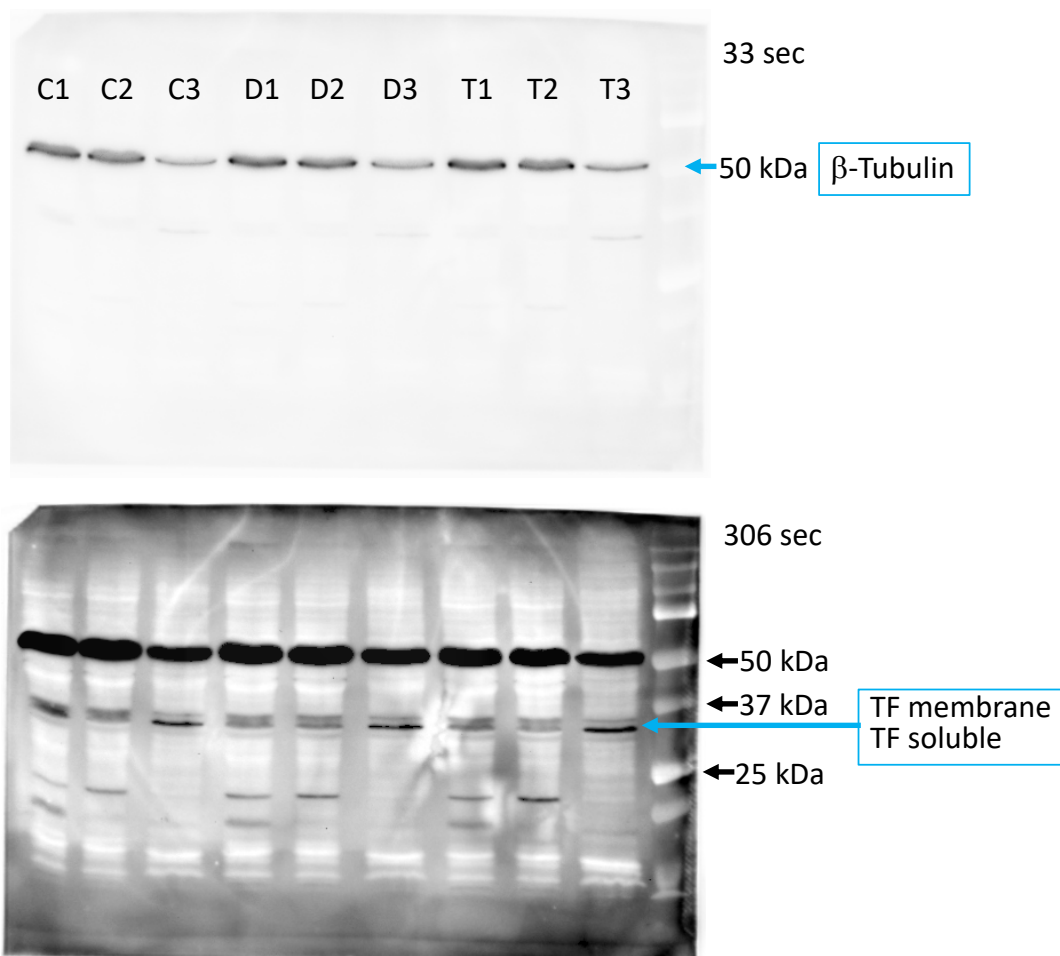

With the Roche ECL substrate two bands were detectable at the molecular weight of TF likely corresponding to the membrane (263 aa, ~35 kDa) and soluble isoforms of TF (206 aa, ~30 kDa).

Analysis of western blot confirmed no changes in both TF isoforms expression in the three examined experiments.

| <i>IntDen</i>     | Band density – Chemiluminescence |           |        |                                    |           |        |                                    |           |        |
|-------------------|----------------------------------|-----------|--------|------------------------------------|-----------|--------|------------------------------------|-----------|--------|
|                   | C1                               | C2        | C3     | D1                                 | D2        | D3     | T1                                 | T2        | T3     |
| $\beta$ -Tubulin  | 460.94                           | 439.19    | 206.53 | 490.11                             | 445.79    | 265.26 | 512.23                             | 452.96    | 256.18 |
| TF membrane       | 202.89                           | 253.29    | 182.44 | 215.14                             | 254.59    | 228.71 | 207.96                             | 197.05    | 247.34 |
| TF soluble        | 282.10                           | 233.74    | 342.49 | 227.31                             | 256.66    | 362.61 | 260.76                             | 196.14    | 504.59 |
| ratio TFm/tub     | 0.440                            | 0.577     | 0.883  | 0.439                              | 0.571     | 0.862  | 0.406                              | 0.435     | 0.966  |
| ratio TFs/tub     | 0.612                            | 0.532     | 1.658  | 0.464                              | 0.576     | 1.367  | 0.509                              | 0.433     | 1.970  |
| ratio TFm+TFs/tub | 1.052                            | 1.109     | 2.542  | 0.903                              | 1.147     | 2.229  | 0.915                              | 0.868     | 2.935  |
|                   | <i>mean</i>                      | <i>SD</i> |        | <i>mean</i>                        | <i>SD</i> |        | <i>mean</i>                        | <i>SD</i> |        |
| TFm/tub           | 0.633                            | 0.227     |        | 0.624                              | 0.217     |        | 0.602                              | 0.315     |        |
| TFs/tub           | 0.934                            | 0.628     |        | 0.802                              | 0.492     |        | 0.971                              | 0.866     |        |
| TFm+TFs/tub       | 1.568                            | 0.844     |        | 1.426                              | 0.706     |        | 1.573                              | 1.180     |        |
|                   |                                  |           |        | <i>Test T paired data: D vs. C</i> |           |        | <i>Test T paired data: T vs. C</i> |           |        |
| TFm/tub           |                                  |           |        | 0.263                              |           |        | 0.677                              |           |        |
| TFs/tub           |                                  |           |        | 0.307                              |           |        | 0.816                              |           |        |
| TFm+TFs/tub       |                                  |           |        | 0.297                              |           |        | 0.981                              |           |        |
|                   |                                  |           |        |                                    |           |        | <i>Test T paired data: T vs. D</i> |           |        |
| TFm/tub           |                                  |           |        |                                    |           |        | 0.782                              |           |        |
| TFs/tub           |                                  |           |        |                                    |           |        | 0.530                              |           |        |
| TFm+TFs/tub       |                                  |           |        |                                    |           |        | 0.666                              |           |        |

Since the background in the chemiluminescence detection was quite strong, the same membrane was washed with PBS and developed again with the colorimetric Opti-4CN substrate (Bio-Rad); the membrane image was acquired with an Epson scanner. Densitometric analysis was repeated with similar results.

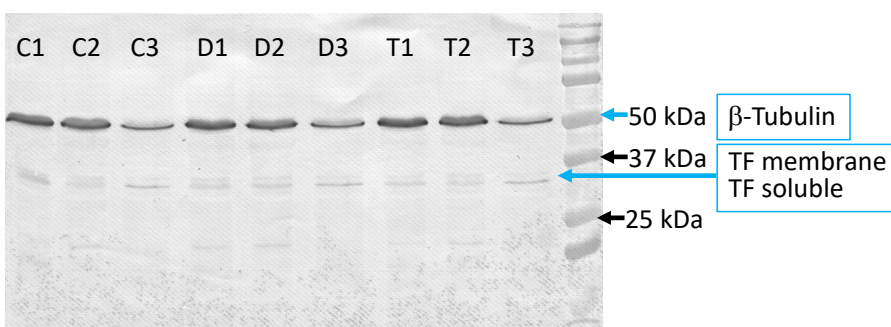

| <i>IntDen</i> | Band density - Colorimetric |           |           |                                    |           |           |                                    |           |           |
|---------------|-----------------------------|-----------|-----------|------------------------------------|-----------|-----------|------------------------------------|-----------|-----------|
|               | <b>C1</b>                   | <b>C2</b> | <b>C3</b> | <b>D1</b>                          | <b>D2</b> | <b>D3</b> | <b>T1</b>                          | <b>T2</b> | <b>T3</b> |
| β-Tubulin     | 919.95                      | 979.65    | 1192.70   | 965.45                             | 1004.52   | 1159.46   | 963.11                             | 995.02    | 1193.16   |
| TF membrane   | 544.63                      | 555.54    | 565.71    | 557.89                             | 558.59    | 563.18    | 570.31                             | 562.11    | 561.59    |
| TF soluble    | 526.22                      | 546.64    | 534.75    | 543.43                             | 540.91    | 534.28    | 551.36                             | 553.62    | 532.20    |
| TFm/tub       | 0.592                       | 0.567     | 0.474     | 0.578                              | 0.556     | 0.486     | 0.592                              | 0.565     | 0.471     |
| TFs/tub       | 0.572                       | 0.558     | 0.448     | 0.563                              | 0.538     | 0.461     | 0.572                              | 0.556     | 0.446     |
| TFm+TFs/tub   | 1.164                       | 1.125     | 0.923     | 1.141                              | 1.095     | 0.947     | 1.165                              | 1.121     | 0.917     |
|               | <i>mean</i>                 | <i>SD</i> |           | <i>mean</i>                        | <i>SD</i> |           | <i>mean</i>                        | <i>SD</i> |           |
| TFm/tub       | 0.544                       | 0.062     |           | 0.540                              | 0.048     |           | 0.543                              | 0.064     |           |
| TFs/tub       | 0.526                       | 0.068     |           | 0.521                              | 0.053     |           | 0.525                              | 0.069     |           |
| TFm+TFs/tub   | 1.071                       | 0.130     |           | 1.061                              | 0.101     |           | 1.068                              | 0.132     |           |
|               |                             |           |           | <i>Test T paired data: D vs. C</i> |           |           | <i>Test T paired data: T vs. C</i> |           |           |
| TFm/tub       |                             |           |           | 0.627                              |           |           | 0.227                              |           |           |
| TFs/tub       |                             |           |           | 0.624                              |           |           | 0.303                              |           |           |
| TFm+TFs/tub   |                             |           |           | 0.617                              |           |           | 0.255                              |           |           |
|               |                             |           |           |                                    |           |           | <i>Test T paired data: T vs. D</i> |           |           |
| TFm/tub       |                             |           |           |                                    |           |           | 0.793                              |           |           |
| TFs/tub       |                             |           |           |                                    |           |           | 0.707                              |           |           |
| TFm+TFs/tub   |                             |           |           |                                    |           |           | 0.742                              |           |           |
